# Supplementary material
Source: MDPI journal article supplement (https://www.mdpi.com/2073-4352/12/2/287)
Supplement: s1 [file s1]

## Supplementary Materials

### Effect of Gold Nanoparticles on the Crystallization and Optical Properties of Glass in ZnO-MgO-Al<sub>2</sub>O<sub>3</sub>-SiO<sub>2</sub> System

Georgiy Shakhgildyan <sup>1,\*</sup>, Veniamin Durymanov <sup>2</sup>, Mariam Ziyatdinova <sup>1,3</sup>, Grigoriy Atroshchenko <sup>1</sup>, Nikita Golubev <sup>1</sup>, Alexey Trifonov <sup>4,5</sup>, Olga Chereuta <sup>1</sup>, Leon Avakyan <sup>2</sup>, Lusegen Bugaev <sup>2</sup> and Vladimir Sigaev <sup>1</sup>

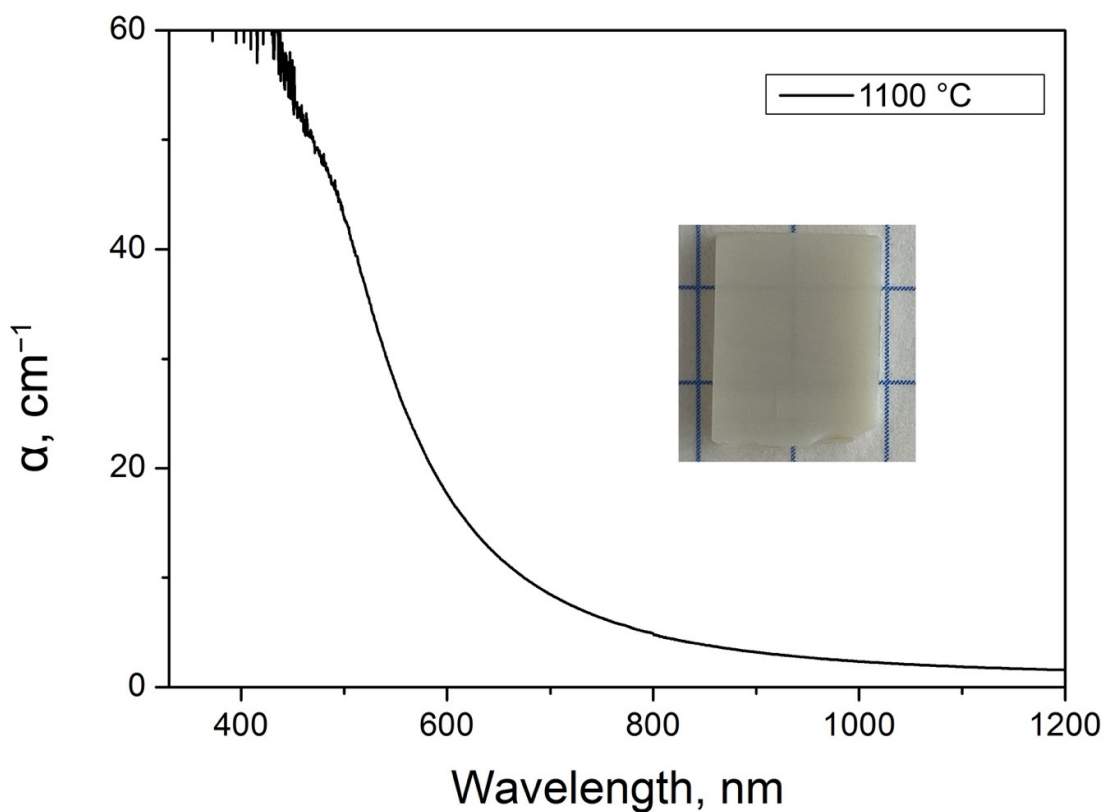

**Figure S1.** Absorption spectrum of the glass sample heat-treated at 1100 °C for 20 h. Inset shows the photo of the glass sample.
